# Supplementary material for: The Au25(pMBA)17Diglyme Cluster
Source: MDPI journal article supplement (doi:10.3390/molecules26092562), 2021-04-28
Supplement: s1 [file s1]

## Supplemental Information

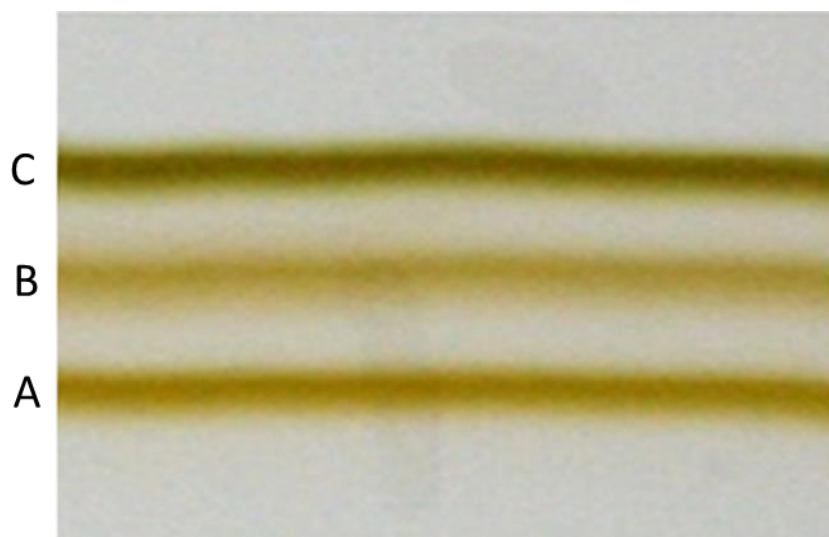

**Supplemental Figure S1:** TBE-PAGE separation of synthetic products A, B, and C. A has been identified as  $\text{Au}_{25}(\text{pMBA})_{17}\text{diglyme}_1$  and is the focus of this work, B and C are expected to be a larger cluster but has yet to be identified.

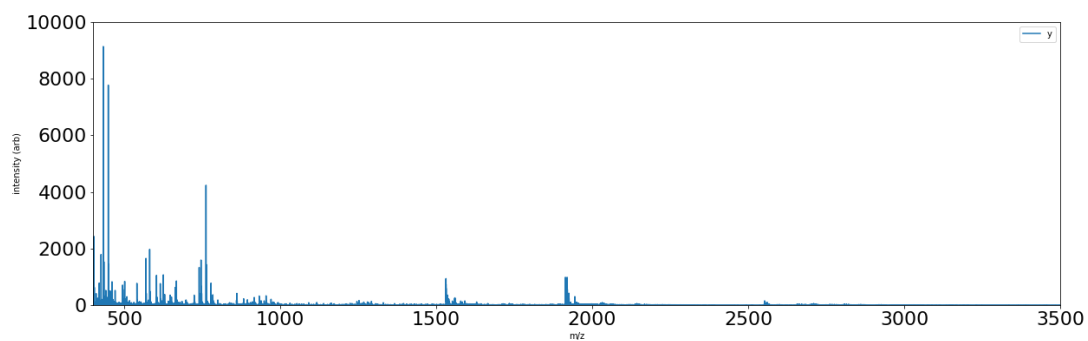

**Supplemental Figure S2:** Full spectra for  $\text{Au}_{25}(\text{pMBA})_{17}\text{diglyme}_1$  analysis.

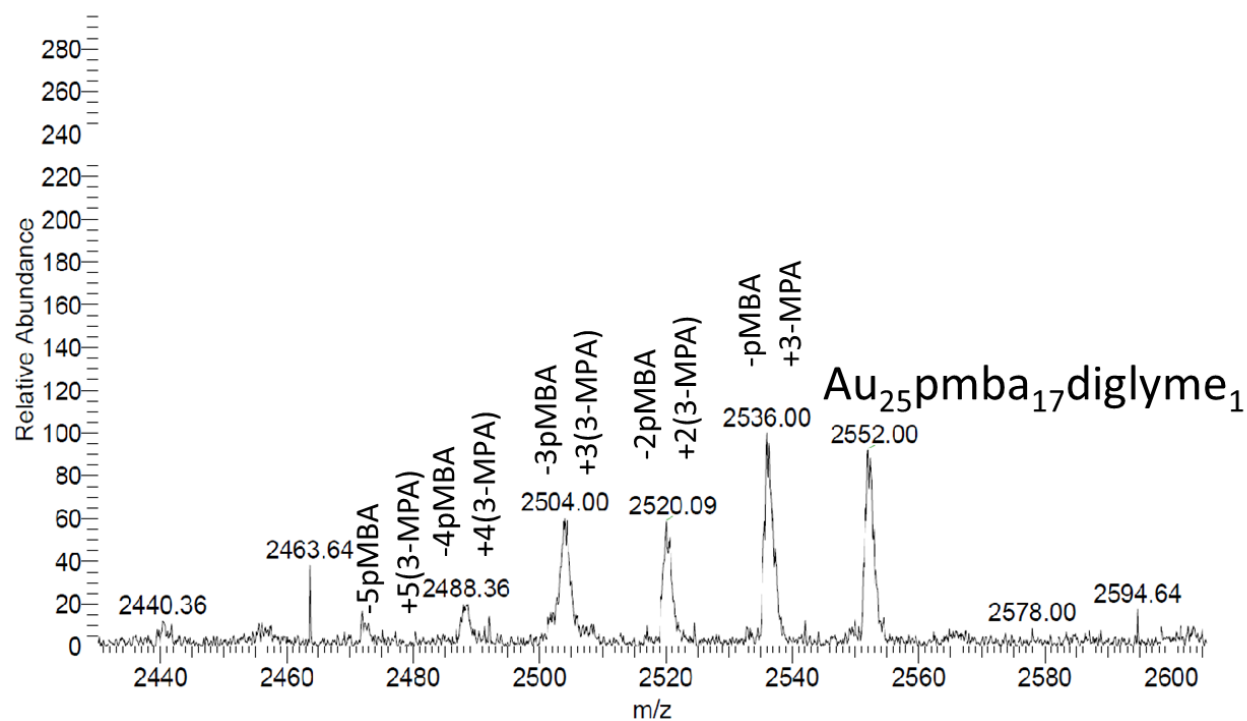

**Supplemental Figure S3:** Ligand exchange with 3-mercaptopropionic acid as the incoming ligand. This was done at a 5000:1 ligand:cluster ratio, and pH of 6.

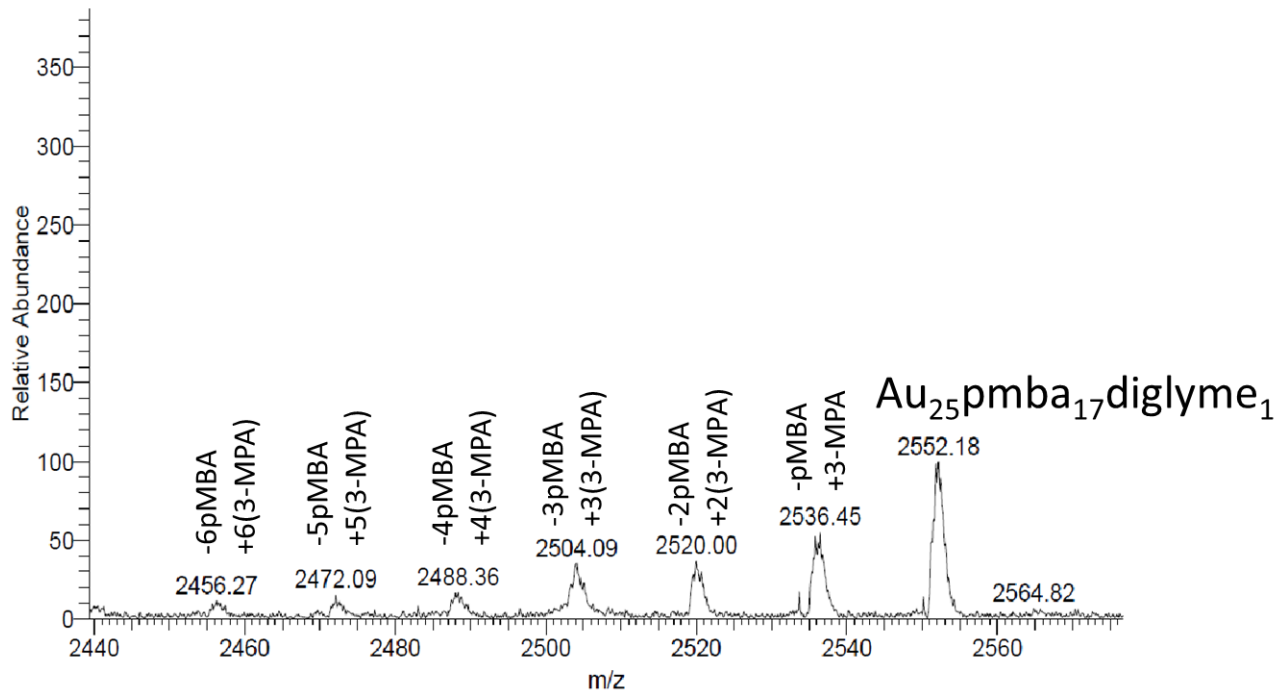

**Supplemental Figure S4:** Ligand exchange with 3-mercaptopropionic acid as the incoming ligand. This was done at a 1000:1 ligand:cluster ratio, and pH of 6.

**Supplemental Table S1:** Peak assignments from Full Spectra

| Parent Peak(m/z) | Charge state | Chemical Formula                                                           |
|------------------|--------------|----------------------------------------------------------------------------|
| 2551.8627        | -3           | Au <sub>25</sub> pmba <sub>17</sub> diglyme <sub>1</sub>                   |
| 2559.1563        | -3           | Au <sub>25</sub> pmba <sub>17</sub> diglyme <sub>1</sub> +Na <sup>+</sup>  |
| 2566.5027        | -3           | Au <sub>25</sub> pmba <sub>17</sub> diglyme <sub>1</sub> +2Na <sup>+</sup> |
| 1913.6447        | -4           | Au <sub>25</sub> pmba <sub>17</sub> diglyme <sub>1</sub>                   |
| 1919.1587        | -4           | Au <sub>25</sub> pmba <sub>17</sub> diglyme <sub>1</sub> +Na <sup>+</sup>  |
| 1924.8815        | -4           | Au <sub>25</sub> pmba <sub>17</sub> diglyme <sub>1</sub> +2Na <sup>+</sup> |
| 1530.7584        | -5           | Au <sub>25</sub> pmba <sub>17</sub> diglyme <sub>1</sub>                   |
| 1535.3315        | -5           | Au <sub>25</sub> pmba <sub>17</sub> diglyme <sub>1</sub> +Na <sup>+</sup>  |
| 1539.7316        | -5           | Au <sub>25</sub> pmba <sub>17</sub> diglyme <sub>1</sub> +2Na <sup>+</sup> |

**Supplemental Table S2:** Table of the observed nanocluster mass and potential assignments.

| Atom Counts          |                          |                           |                         |          |          |          |          |          |
|----------------------|--------------------------|---------------------------|-------------------------|----------|----------|----------|----------|----------|
| Au<br>(196.97a.u.)   | pMBA -H<br>(153.182a.u.) | pMBA -2H<br>(152.182a.u.) | diglyme<br>(134.17a.u.) | mass     | mass/2   | mass/3   | mass/4   | mass/5   |
| 25                   | 18                       | 0                         | 0                       | 7681.526 | 3840.763 | 2560.509 | 1920.382 | 1536.305 |
| 25                   | 0                        | 18                        | 0                       | 7663.382 | 3831.691 | 2554.461 | 1915.846 | 1532.676 |
| 25                   | 17                       | 0                         | 1                       | 7662.514 | 3831.257 | 2554.171 | 1915.629 | 1532.503 |
| 25                   | 0                        | 17                        | 1                       | 7645.378 | 3822.689 | 2548.459 | 1911.345 | 1529.076 |
| 25                   | 9                        | 8                         | 1                       | 7654.45  | 3827.225 | 2551.483 | 1913.613 | 1530.89  |
| 24                   | 0                        | 20                        | 0                       | 7770.76  | 3885.38  | 2590.253 | 1942.69  | 1554.152 |
| 23                   | 16                       | 0                         | 0                       | 6981.222 | 3490.611 | 2327.074 | 1745.306 | 1396.244 |
| Observed Nanocluster |                          |                           |                         | 7655.5   |          | 2551.843 | 1913.666 | 1530.749 |
